# Supplementary material
Source: ML conference proceedings conference paper supplement (https://openaccess.thecvf.com/content/CVPR2023/html/Cao_A_New_Comprehensive_CVPR_2023_paper.html)
Supplement: Supplementary file 1 [file Cao_A_New_Comprehensive_CVPR_2023_supplemental.zip]

Archive with 1 entries (1 files):
- A New Comprehensive Benchmark for - supp.pdf
